# Supplementary material for: Systematic evaluation of fMRI data-processing pipelines for consistent functional connectomics
Source: PubMed Central journal article supplement (PMC11150439; doi:10.1038/s41467-024-48781-5), 2024-06-04
Supplement: 41467_2024_48781_MOESM2_ESM.pdf [file 41467_2024_48781_MOESM2_ESM.pdf]

## **Description of Additional Supplementary Files:**

**Supplementary Data 1:** Final selection of pipelines that meet all criteria.

**Supplementary Data 2:** Interactive Pipeline Selection Tool, providing a breakdown of each pipeline's performance across all criteria and all datasets.
